# Supplementary material for: Impact of Primary RPE Cells in a Porcine Organotypic Co-Cultivation Model
Source: MDPI journal article supplement (doi:10.3390/biom12070990), 2022-07-16
Supplement: s1 [file s1]

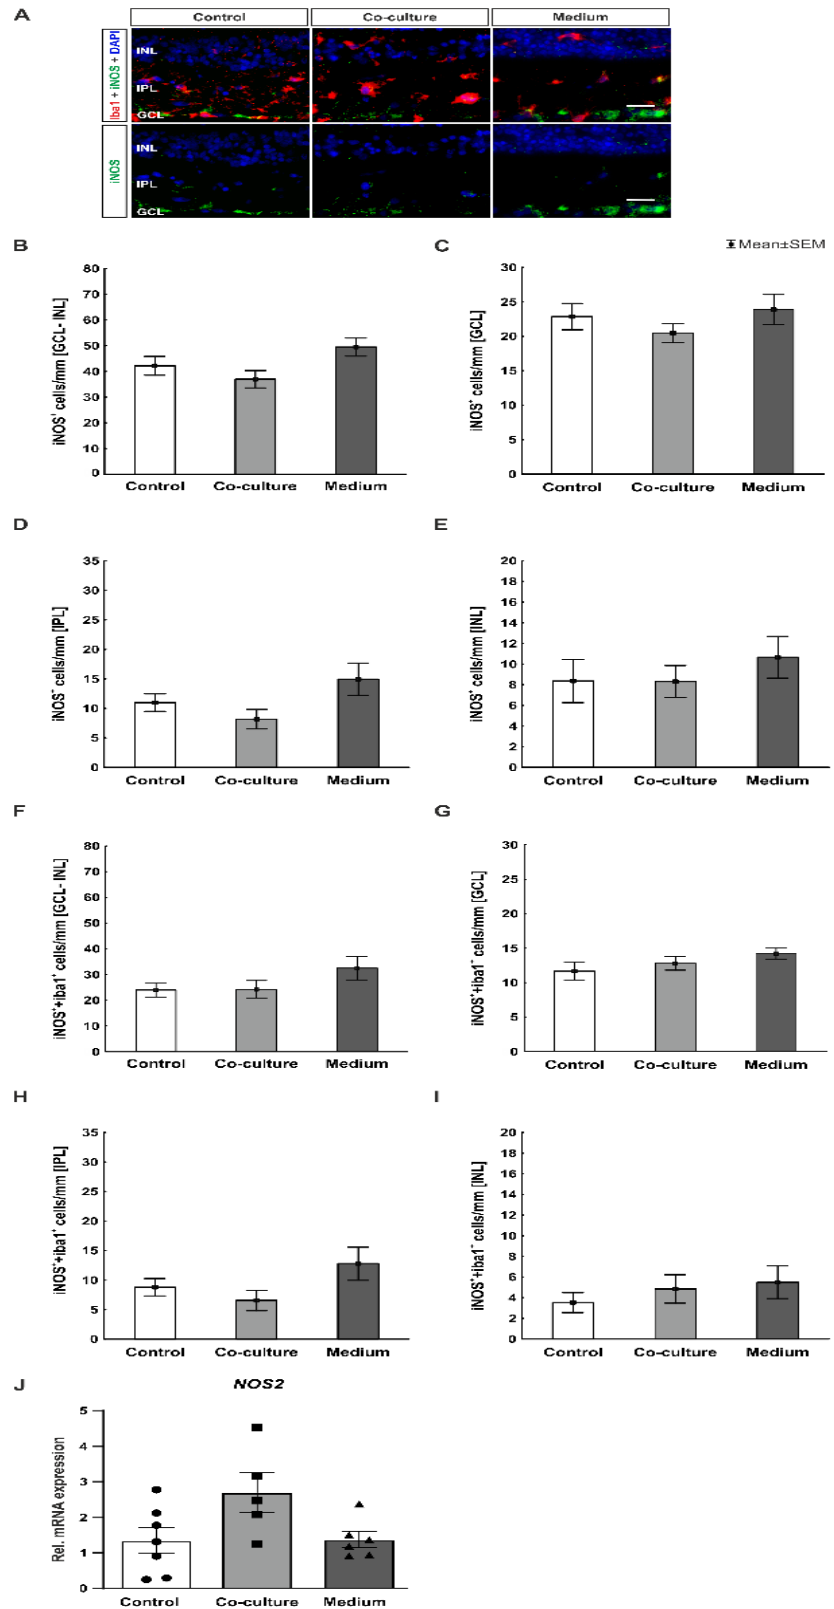

**Figure S1.** Evaluation of active microglia. **(A)** iNOS<sup>+</sup> cells were stained (green). Active microglia were identified by the co-localization of iNOS and Iba1 (red), while cell nuclei were labelled with DAPI (blue). **(B)** The number of iNOS<sup>+</sup> cells was similar in the GCL to INL. iNOS<sup>+</sup> cell counts were also comparable in the GCL **(C)**, IPL **(D)**, and INL **(E)**. **(F)** The number of iNOS<sup>+</sup> and Iba1<sup>+</sup> cells was comparable in the GCL to INL in all groups. Again, no significant differences in the number of iNOS<sup>+</sup> and Iba1<sup>+</sup> cells were detected in the

individual retinal layers, GCL (**G**), IPL (**H**), and INL (**I**). (**J**) The relative mRNA expression level of *NOS2* was not altered in all groups. INL, inner nuclear layer; IPL, inner plexiform layer; GCL, ganglion cell layer. Scale bar: 20  $\mu$ m, values are presented as mean $\pm$ SEM, (**A-I**) n=8/group, (**J**) n=6/group.

**Table S1.** List of defined background, lower and upper threshold values.

| Staining  | Background subtraction | Lower threshold | Upper threshold |
|-----------|------------------------|-----------------|-----------------|
| PSD-95    | 50                     | 8.61            | 77.00           |
| Rhodopsin | 50                     | 13.32           | 121.00          |
| vGluT1    | 50                     | 5.69            | 255.00          |
